# Supplementary material
Source: PubMed Central journal article supplement (PMC3397261)
Supplement: mmc1.pdf [file mmc1.pdf]

## Supplemental Data

### Estimating Kinship in Admixed Populations

Timothy Thornton, Hua Tang, Thomas J. Hoffmann, Heather M. Ochs-Balcom, Bette J. Caan, and Neil Risch

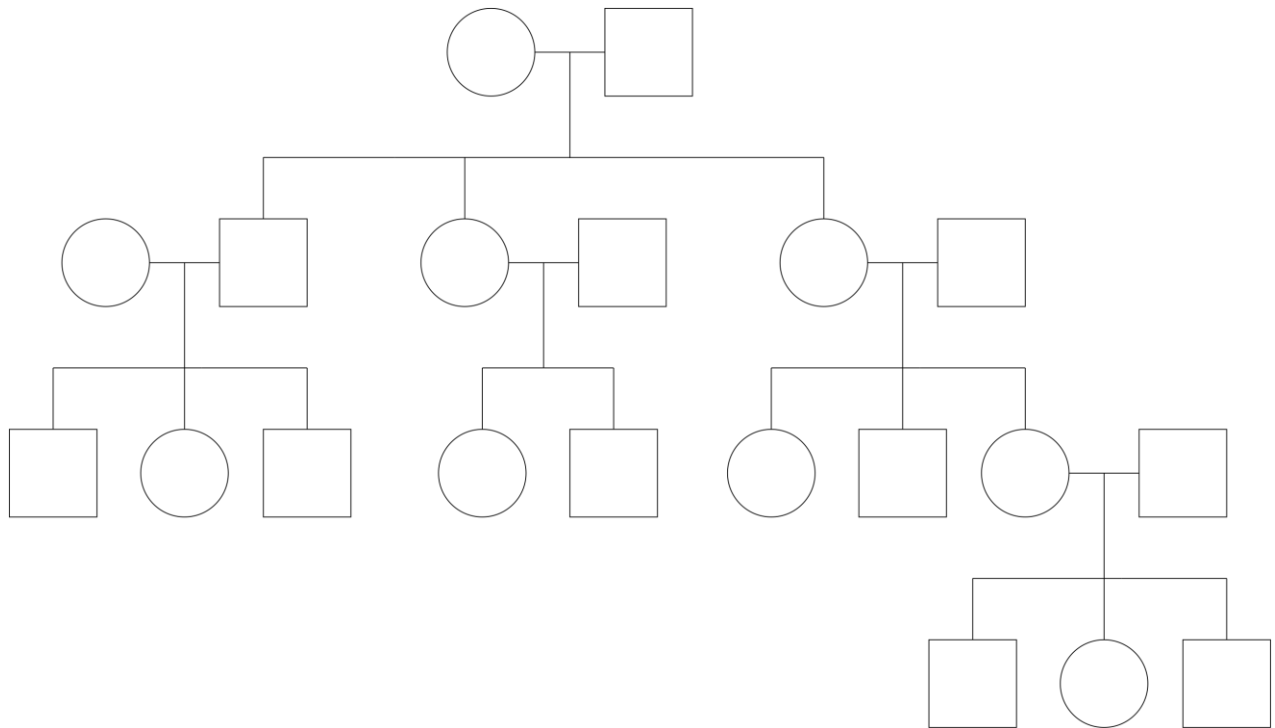

**Figure S1. Extended Pedigree Configuration for the Simulation Studies**

The pedigree configuration for each of the 40 outbred, four-generation pedigrees included in the simulation studies, where the overall structure of each pedigree is as depicted, but the pattern of ancestry admixture varies according to the specified population structure setting.

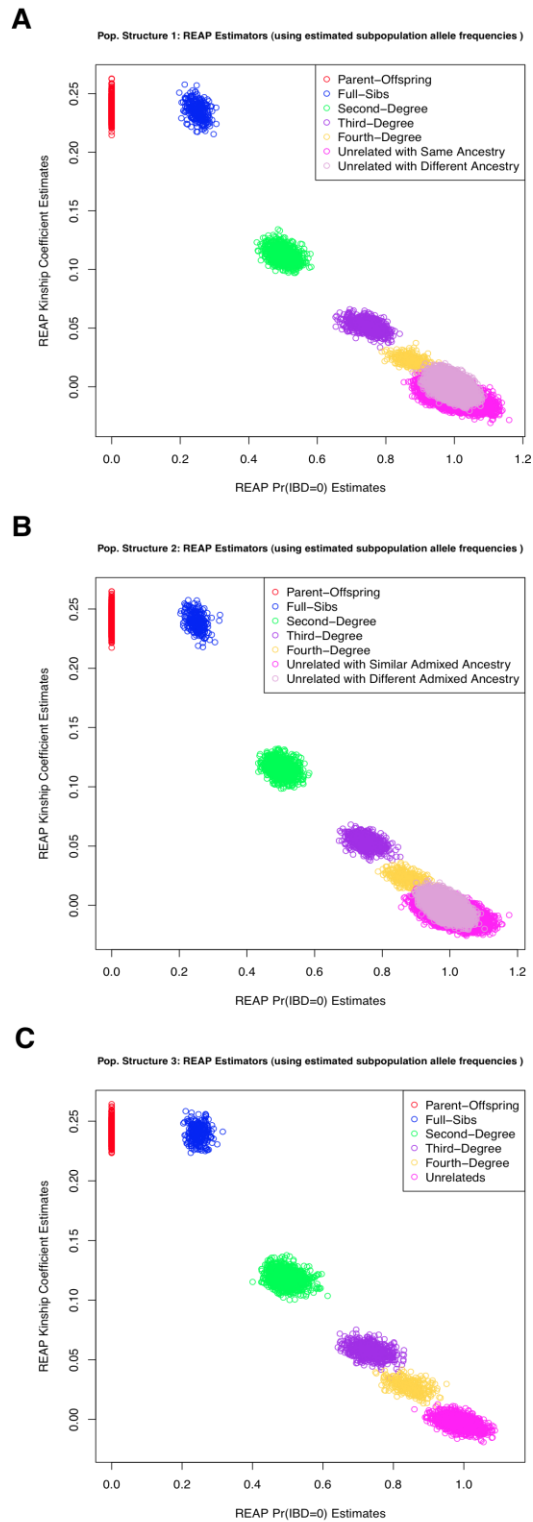

**Figure S2. REAP Kinship Coefficients versus Zero IBD Sharing Probabilities with Estimated Allele Frequencies**

(A), (B), and (C) are REAP estimated kinship coefficients plotted against zero IBD sharing probability estimates for the population structure settings 1, 2, and 3, respectively, using subpopulation allele frequencies that were estimated using the *frappe* software program. Kinship coefficients and zero IBD sharing probabilities were calculated using the REAP estimators of equations (3) and (4), respectively, with 10,000 simulated random SNPs.

### Ancestry Misspecification Setting 1: REAP Estimators

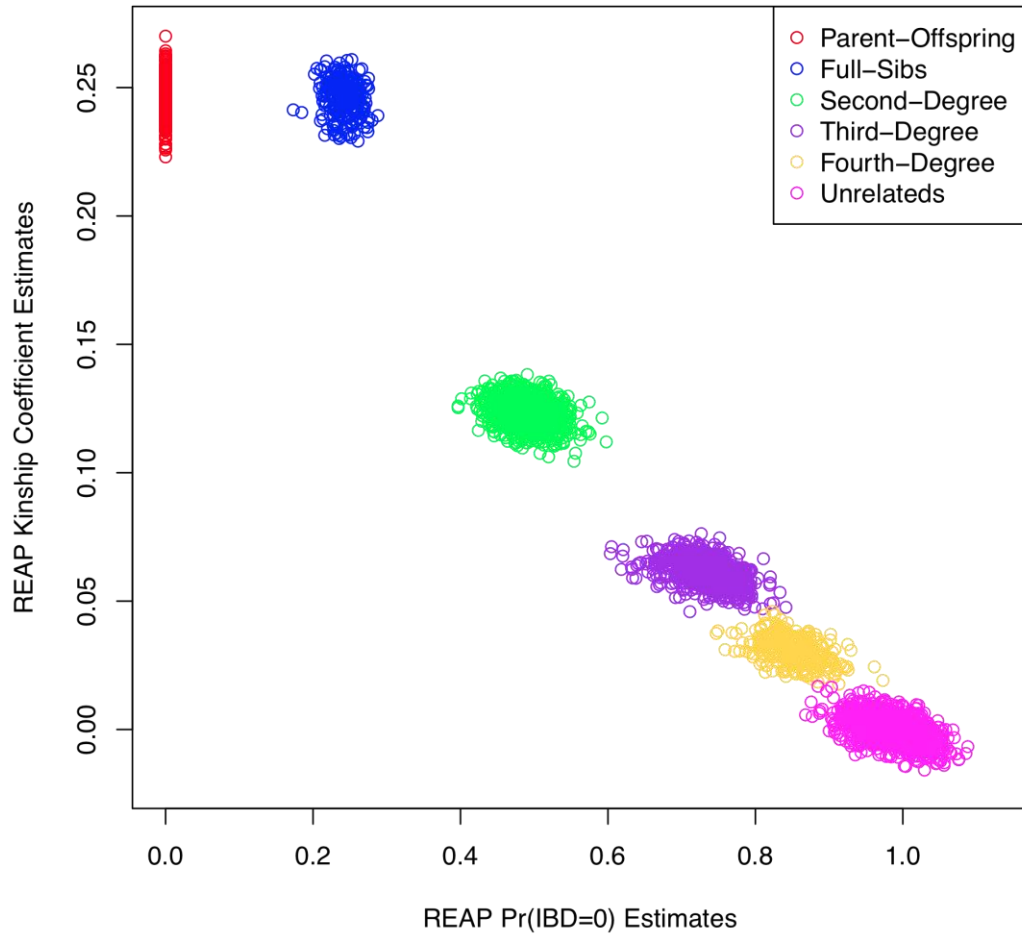

**Figure S3. REAP Kinship Coefficients versus Zero IBD Sharing Probabilities with Misspecification of the Ancestral Populations**

REAP estimated kinship coefficients plotted against zero IBD sharing probability estimates for misspecification setting 1, which corresponds to population structure setting 3, where the sample individuals in this population structure setting have admixture from three subpopulations, but with the number of ancestral populations incorrectly set to  $K=4$  in the *frappe* software analysis for individual ancestry estimation. Kinship coefficients and zero IBD sharing probabilities were calculated using the REAP estimators of equations (3) and (4), respectively, with the estimated ancestry proportions and subpopulation allele frequencies from the *frappe* software program, for 10,000 random SNPs.

### Ancestry Misspecification Setting 2: REAP Estimators

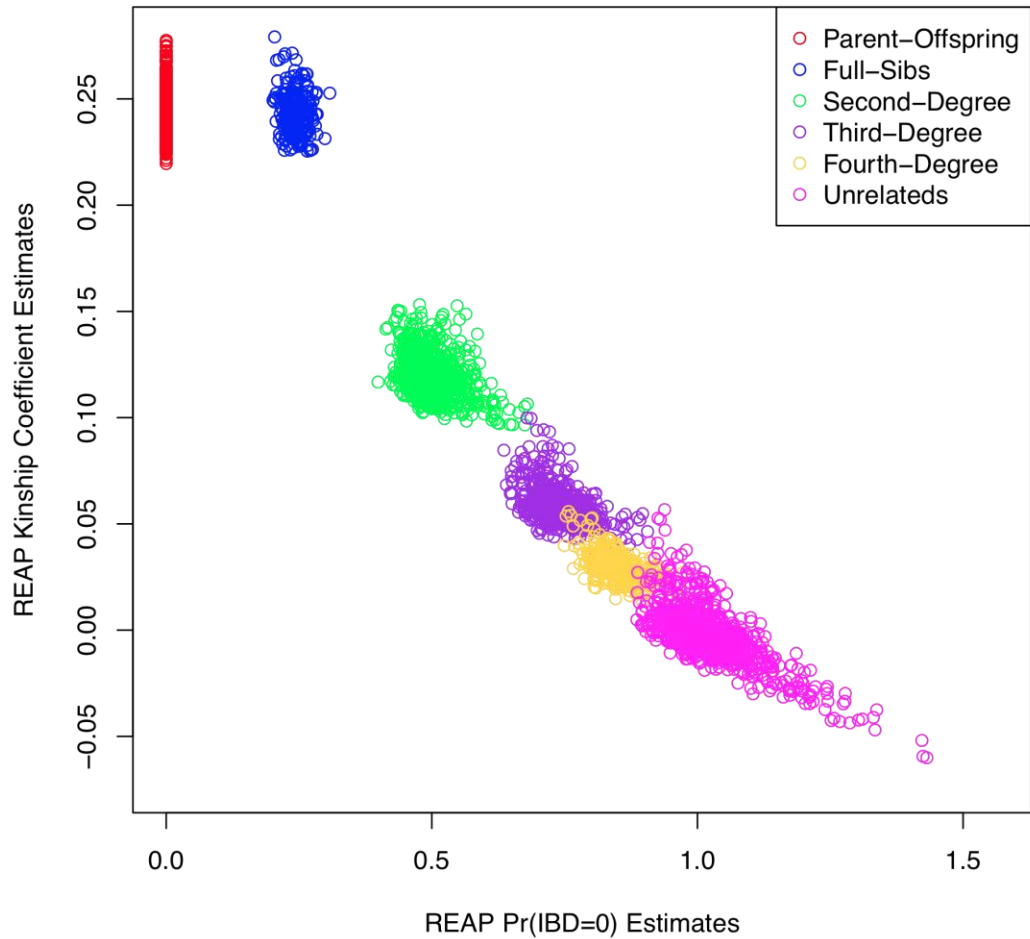

**Figure S4. REAP Kinship Coefficients versus Zero IBD Sharing Probabilities with Misspecification of the Ancestral Populations**

REAP estimated kinship coefficients plotted against zero IBD sharing probability estimates for misspecification setting 1, which corresponds to population structure setting 3, where the sample individuals in this population structure setting have admixture from three subpopulations, but with the number of ancestral populations incorrectly set to  $K=2$  in the *frappe* software analysis for individual ancestry estimation. Kinship coefficients and zero IBD sharing probabilities were calculated using the REAP estimators of equations (3) and (4), respectively, with the estimated ancestry proportions and subpopulation allele frequencies from the *frappe* software program, for 10,000 random SNPs.

### Pop. Structure 2: REAP Estimators (5000 SNPs)

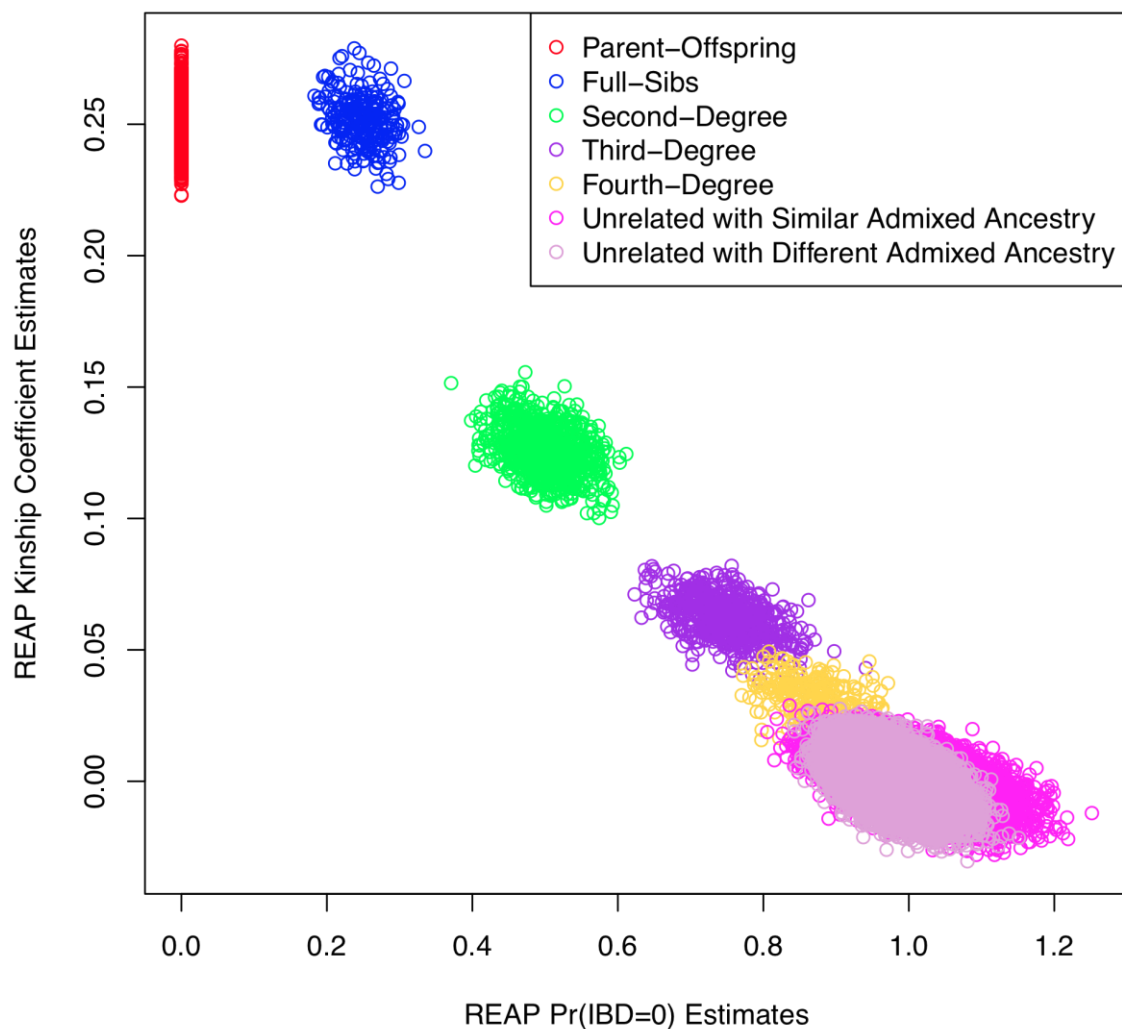

**Figure S5. REAP Kinship Coefficients versus Zero IBD Sharing Probabilities with 5000 SNPs**

REAP kinship coefficient estimates plotted against REAP zero IBD sharing probability estimates for population structure setting 2. REAP estimates were calculated using the kinship coefficient and zero IBD sharing probability estimators of equations (3) and (4), respectively, with 5,000 simulated random SNPs.

### HapMap MXL: Kinship Coefficients less than .045

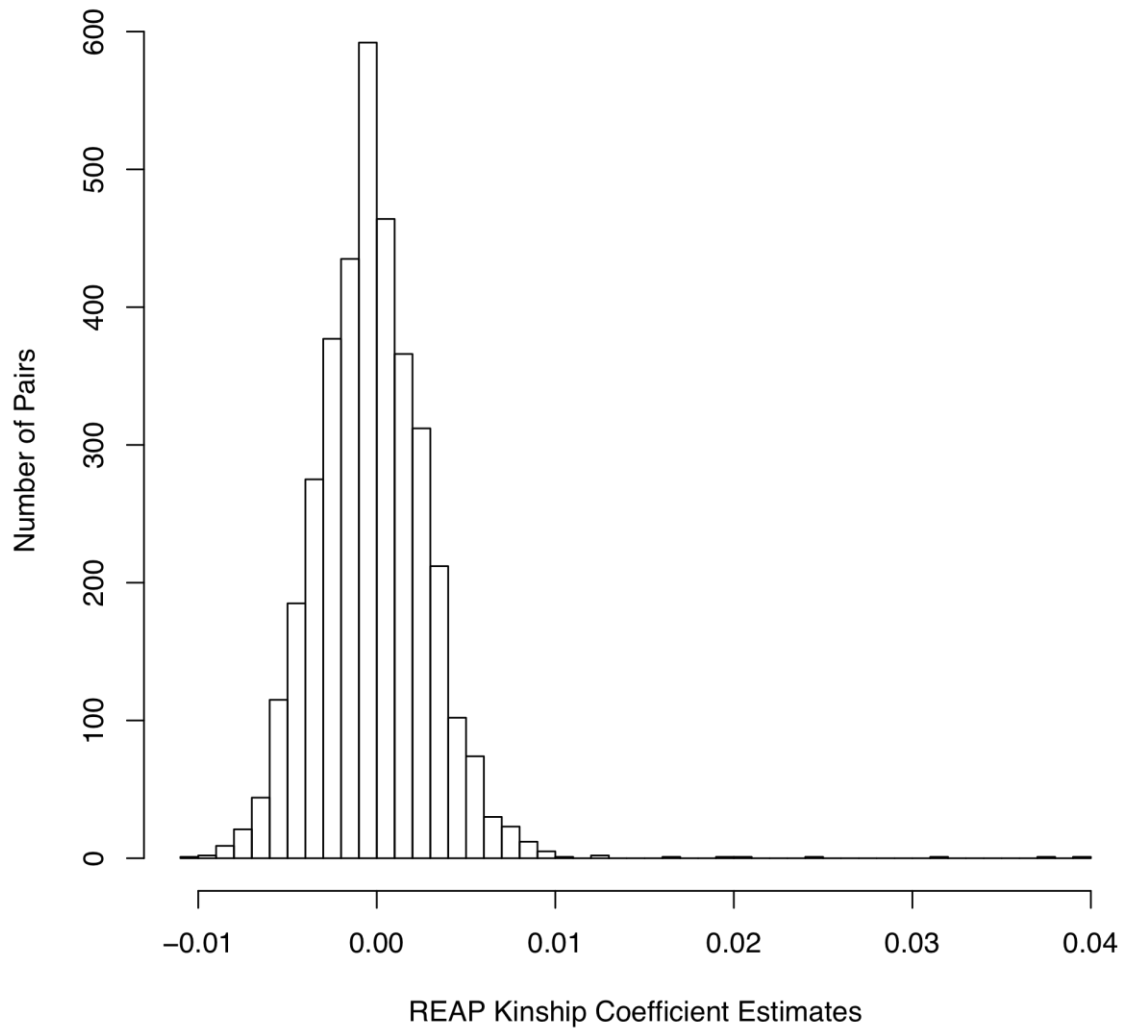

**Figure S6. Histogram of REAP Estimated Kinship Coefficients that Are Less than .045 for HapMap MXL**

The REAP kinship coefficient estimator of equation (3) was used to estimate kinship coefficients for all pairs of individuals in HapMap MXL. The histogram given is for REAP kinship coefficient values that are less than 0.045. All REAP kinship coefficients were calculated using 150,872 SNPs from the autosomal chromosomes.

### WHI-SHARe African Americans: Kinship Coefficients from .02 to .045

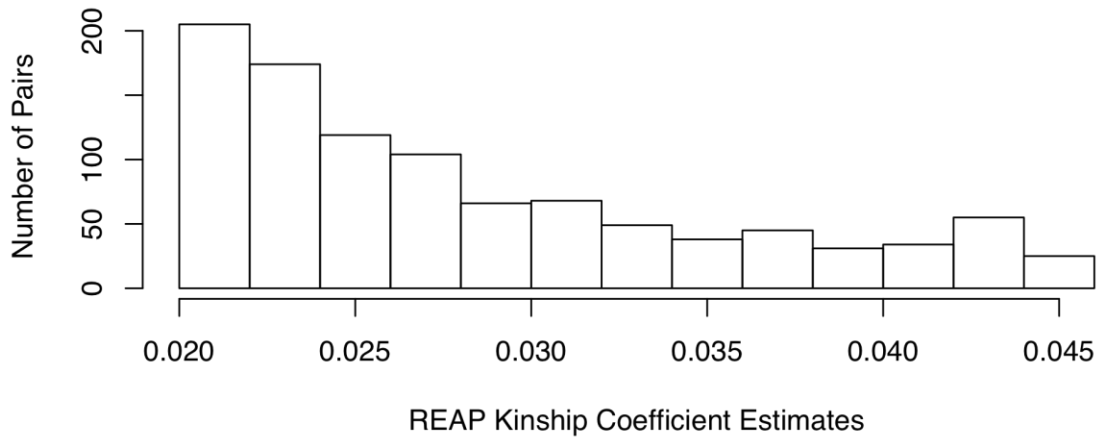

### WHI-SHARe African Americans: Kinship Coefficients less than .02

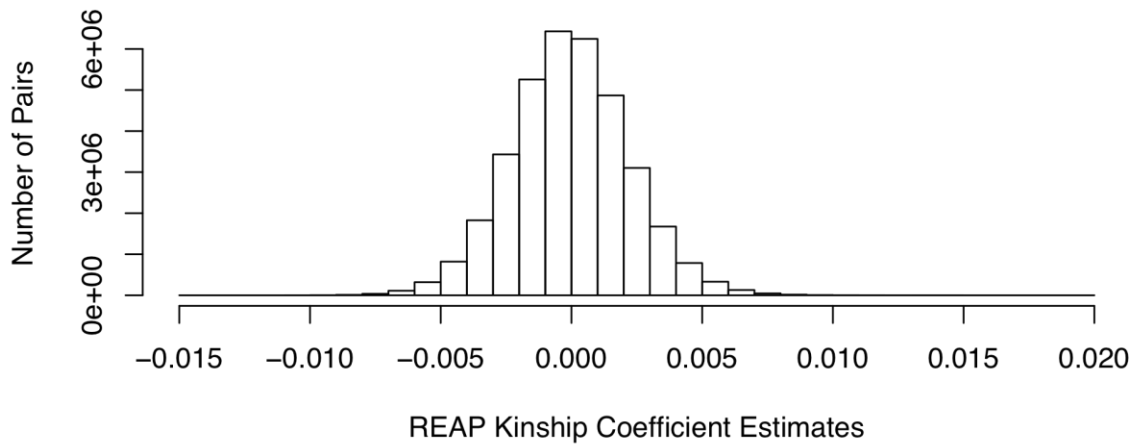

**Figure S7. Histograms of REAP Estimated Kinship Coefficients that Are Less than .045 for WHI-SHARe African Americans**

The REAP kinship coefficient estimator of equation (3) was used to estimate kinship coefficients for all pairs of self-reported African Americans in the WHI-SHARe study. Histograms are given for REAP kinship coefficient values between 0.045 and 0.025 and for REAP kinship coefficient values that are less than 0.025. All REAP kinship coefficients were calculated using 656,852 SNPs from the autosomal chromosomes.

### WHI-SHARe Hispanics: Kinship Coefficients from .02 to .045

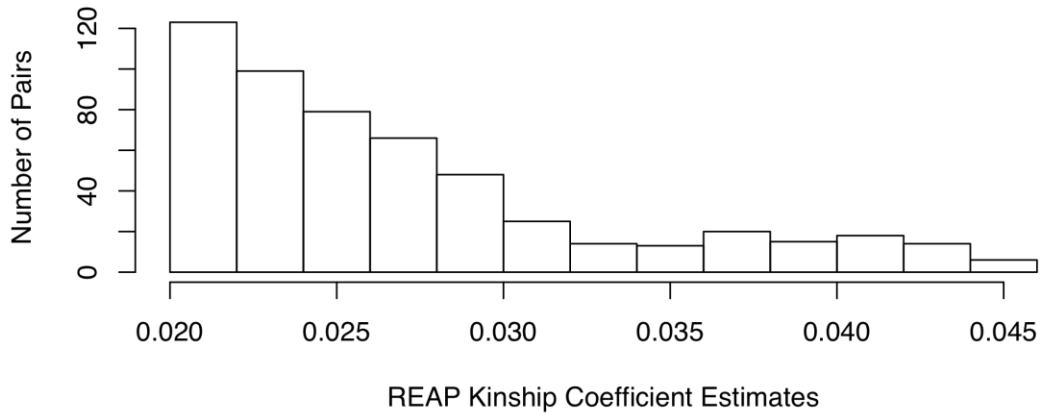

### WHI-SHARe Hispanics: Kinship Coefficients less than .02

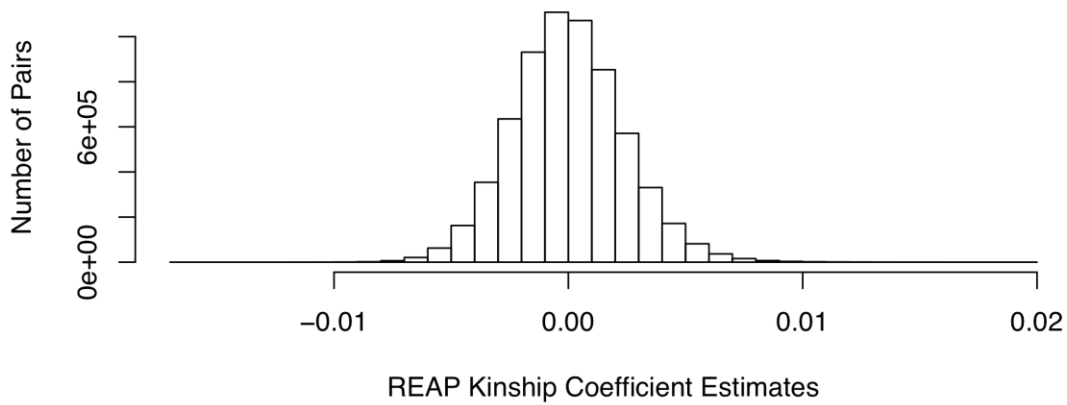

**Figure S8. Histograms of REAP Estimated Kinship Coefficients that Are Less than .045 for WHI-SHARe Hispanics**

The REAP kinship coefficient estimator of equation (3) was used to estimate kinship coefficients for all pairs of self-reported Hispanics in the WHI-SHARe study. Histograms are given for REAP kinship coefficient values between 0.045 and 0.025 and for REAP kinship coefficient values that are less than 0.025. All REAP kinship coefficients were calculated using 656,852 SNPs from the autosomal chromosomes.



**Table S1. REAP Kinship Coefficient Estimates for Misspecification Setting 2 and with Ancestry Correctly Specified**

| <b>Outbred Relationship</b> | <b><math>\phi</math>(Kinship Coefficient)</b> |                                                                      |                                                       |
|-----------------------------|-----------------------------------------------|----------------------------------------------------------------------|-------------------------------------------------------|
|                             | <b>Theoretical Kinship Coefficient</b>        | <b>REAP Estimate (SD): Ancestral Populations Correctly Specified</b> | <b>Reap Estimate (SD): Misspecification Setting 2</b> |
| Parent-offspring            | 0.25                                          | 0.247 (0.007)                                                        | 0.245 (0.010)                                         |
| Full siblings               | 0.25                                          | 0.245 (0.007)                                                        | 0.244 (0.010)                                         |
| Second-degree               | 0.125                                         | 0.124 (0.006)                                                        | 0.120 (0.010)                                         |
| Third-degree                | 0.0625                                        | 0.062 (0.005)                                                        | 0.059 (0.009)                                         |
| Fourth-degree               | 0.03125                                       | 0.032 (0.005)                                                        | 0.030 (0.007)                                         |
| Unrelated                   | 0                                             | 0.00002 (0.005)                                                      | -0.003 (0.009)                                        |

REAP kinship coefficients were estimated for population structure 3, where all sample individuals have admixture from three subpopulations. In the table, REAP with the ancestral populations correctly specified and REAP under misspecification setting 2 correspond to the REAP estimator of equation (3) calculated using individual ancestry estimates from the *frappe* software program with the number of ancestral populations correctly set to three and with the number of ancestral populations incorrectly set to two, respectively. The REAP kinship coefficients were estimated using 10,000 simulated random SNPs.

**Table S2. REAP-Inferred Relative Pairs in Release 3 of Phase III of the HapMap MXL Population Sample**

| First Individual |                       |     | Second Individual |                       |     | REAP-Inferred Relationship | HapMap Reported Relatives |
|------------------|-----------------------|-----|-------------------|-----------------------|-----|----------------------------|---------------------------|
| Family Number    | Identification Number | Sex | Family Number     | Identification Number | Sex |                            |                           |
| M001             | NA19649               | M   | M001              | NA19650               | M   | parent-offspring           | yes                       |
| M002             | NA19669               | F   | M002              | NA19671               | F   | parent-offspring           | yes                       |
| M002             | NA19671               | F   | M002              | NA19670               | M   | parent-offspring           | yes                       |
| M004             | NA19675               | F   | M004              | NA19677               | F   | parent-offspring           | yes                       |
| M004             | NA19676               | M   | M004              | NA19677               | F   | parent-offspring           | yes                       |
| M004             | NA19675               | F   | M009              | NA19678               | F   | parent-offspring           | no                        |
| M004             | NA19675               | F   | M009              | NA19680               | F   | full-siblings              | no                        |
| M004             | NA19675               | F   | M009              | NA19679               | M   | parent-offspring           | no                        |
| M004             | NA19677               | F   | M009              | NA19678               | F   | second-degree              | no                        |
| M004             | NA19677               | F   | M009              | NA19680               | F   | second-degree              | no                        |
| M004             | NA19677               | F   | M009              | NA19679               | M   | second-degree              | no                        |
| M005             | NA19651               | F   | M005              | NA19653               | F   | parent-offspring           | yes                       |
| M005             | NA19653               | F   | M005              | NA19652               | M   | parent-offspring           | yes                       |
| M006             | NA19656               | F   | M006              | NA19654               | F   | parent-offspring           | yes                       |
| M007             | NA19657               | F   | M007              | NA19659               | F   | parent-offspring           | yes                       |
| M007             | NA19658               | M   | M007              | NA19659               | F   | parent-offspring           | yes                       |
| M007             | NA19657               | F   | M032              | NA19785               | F   | fourth-degree              | no                        |
| M007             | NA19657               | F   | M032              | NA19787               | M   | complex <sup>a</sup>       | no                        |
| M007             | NA19657               | F   | M032              | NA19786               | M   | third-degree               | no                        |
| M007             | NA19659               | F   | M032              | NA19787               | M   | complex <sup>b</sup>       | no                        |
| M007             | NA19659               | F   | M032              | NA19786               | M   | third-degree               | no                        |
| M008             | NA19660               | F   | 2382              | NA19672               | F   | full-siblings              | no                        |
| M008             | NA19662               | F   | 2382              | NA19672               | F   | second-degree              | no                        |
| M008             | NA19661               | M   | M008              | NA19662               | F   | parent-offspring           | yes                       |
| M008             | NA19660               | F   | M008              | NA19662               | F   | parent-offspring           | yes                       |
| M008             | NA19661               | M   | M011              | NA19685               | M   | parent-offspring           | no                        |
| M008             | NA19660               | F   | M011              | NA19685               | M   | parent-offspring           | no                        |
| M008             | NA19662               | F   | M011              | NA19685               | M   | full-siblings              | no                        |
| M009             | NA19678               | F   | M009              | NA19680               | F   | parent-offspring           | yes                       |
| M009             | NA19680               | F   | M009              | NA19679               | M   | parent-offspring           | yes                       |
| M010             | NA19683               | F   | M010              | NA19682               | M   | parent-offspring           | yes                       |
| M010             | NA19683               | F   | M010              | NA19681               | F   | parent-offspring           | yes                       |
| M011             | NA19686               | F   | 2382              | NA19672               | F   | third-degree               | no                        |
| M011             | NA19685               | M   | 2382              | NA19672               | F   | second-degree              | no                        |
| M011             | NA19686               | F   | M008              | NA19661               | M   | second-degree              | no                        |
| M011             | NA19686               | F   | M008              | NA19660               | F   | second-degree              | no                        |
| M011             | NA19686               | F   | M008              | NA19662               | F   | second-degree              | no                        |
| M011             | NA19686               | F   | M011              | NA19684               | F   | parent-offspring           | yes                       |
| M011             | NA19686               | F   | M011              | NA19685               | M   | parent-offspring           | yes                       |
| M012             | NA19664               | M   | 2382              | NA19672               | F   | second-degree              | no                        |
| M012             | NA19665               | F   | 2382              | NA19672               | F   | third-degree               | no                        |
| M012             | NA19664               | M   | M008              | NA19660               | F   | second-degree              | no                        |
| M012             | NA19664               | M   | M008              | NA19662               | F   | third-degree               | no                        |
| M012             | NA19665               | F   | M008              | NA19660               | F   | third-degree <sup>c</sup>  | no                        |
| M012             | NA19665               | F   | M008              | NA19662               | F   | fourth-degree              | no                        |
| M012             | NA19664               | M   | M011              | NA19686               | F   | fourth-degree              | no                        |
| M012             | NA19664               | M   | M011              | NA19685               | M   | third-degree               | no                        |
| M012             | NA19665               | F   | M011              | NA19685               | M   | fourth-degree              | no                        |
| M012             | NA19663               | F   | M012              | NA19665               | F   | parent-offspring           | yes                       |
| M012             | NA19664               | M   | M012              | NA19665               | F   | parent-offspring           | yes                       |

**Table S2. Continued**

| First Individual |                       |     | Second Individual |                       |     | REAP-Inferred Relationship | HapMap Reported Relatives |
|------------------|-----------------------|-----|-------------------|-----------------------|-----|----------------------------|---------------------------|
| Family Number    | Identification Number | Sex | Family Number     | Identification Number | Sex |                            |                           |
| M014             | NA19718               | F   | M014              | NA19716               | F   | parent-offspring           | yes                       |
| M015             | NA19719               | F   | M015              | NA19721               | F   | parent-offspring           | yes                       |
| M015             | NA19720               | M   | M015              | NA19721               | F   | parent-offspring           | yes                       |
| M016             | NA19722               | F   | M016              | NA19724               | M   | parent-offspring           | yes                       |
| M016             | NA19723               | M   | M016              | NA19724               | M   | parent-offspring           | yes                       |
| M017             | NA19726               | M   | M017              | NA19727               | M   | parent-offspring           | yes                       |
| M017             | NA19725               | F   | M017              | NA19727               | M   | parent-offspring           | yes                       |
| M023             | NA19747               | M   | M023              | NA19748               | F   | parent-offspring           | yes                       |
| M023             | NA19746               | F   | M023              | NA19748               | F   | parent-offspring           | yes                       |
| M024             | NA19749               | F   | M024              | NA19751               | M   | parent-offspring           | yes                       |
| M024             | NA19751               | M   | M024              | NA19750               | M   | parent-offspring           | yes                       |
| M026             | NA19755               | F   | M026              | NA19757               | M   | parent-offspring           | yes                       |
| M026             | NA19756               | M   | M026              | NA19757               | M   | parent-offspring           | yes                       |
| M027             | NA19759               | M   | M027              | NA19760               | F   | parent-offspring           | yes                       |
| M028             | NA19761               | F   | M028              | NA19763               | F   | parent-offspring           | yes                       |
| M028             | NA19762               | M   | M028              | NA19763               | F   | parent-offspring           | yes                       |
| M031             | NA19772               | M   | M031              | NA19771               | M   | parent-offspring           | yes                       |
| M031             | NA19772               | M   | M031              | NA19770               | F   | parent-offspring           | yes                       |
| M032             | NA19785               | F   | M032              | NA19787               | M   | parent-offspring           | yes                       |
| M032             | NA19787               | M   | M032              | NA19786               | M   | parent-offspring           | yes                       |
| M033             | NA19773               | F   | M033              | NA19775               | F   | parent-offspring           | yes                       |
| M033             | NA19774               | M   | M033              | NA19775               | F   | parent-offspring           | yes                       |
| M034             | NA19776               | F   | M034              | NA19778               | M   | parent-offspring           | yes                       |
| M034             | NA19777               | M   | M034              | NA19778               | M   | parent-offspring           | yes                       |
| M035             | NA19780               | M   | M035              | NA19781               | F   | parent-offspring           | yes                       |
| M035             | NA19779               | F   | M035              | NA19781               | F   | parent-offspring           | yes                       |
| M036             | NA19783               | M   | M036              | NA19784               | M   | parent-offspring           | yes                       |
| M036             | NA19784               | M   | M036              | NA19782               | F   | parent-offspring           | yes                       |
| M037             | NA19788               | F   | M037              | NA19790               | F   | parent-offspring           | yes                       |
| M037             | NA19790               | F   | M037              | NA19789               | M   | parent-offspring           | yes                       |
| M039             | NA19796               | M   | M039              | NA19794               | F   | parent-offspring           | yes                       |
| M039             | NA19796               | M   | M039              | NA19795               | M   | parent-offspring           | yes                       |

<sup>a</sup> NA19657 is related to NA19787 through NA19787's maternal and paternal lineage based on constructed pedigree(s), so the relationships is labeled as complex.

<sup>b</sup> NA19659 is related to NA19787 through NA19787's maternal and paternal lineage based on constructed pedigree(s), so the relationship is labeled as complex in the table.

<sup>c</sup> The relationship for NA19660 and NA19665 given in the table was changed from the REAP inferred fourth-degree to third-degree based on constructed pedigree(s).
